# Supplementary material for: A Structural Competency Curriculum for Primary Care Providers to Address the Opioid Use Disorder, HIV, and Hepatitis C Syndemic
Source: PubMed Central journal article supplement (PMC7289946; doi:10.3389/fpubh.2020.00210), 2020-06-05
Supplement: Presentation_1.pdf [file Presentation_1.pdf]



Developing Structural Competency to Address  
the Opioid Use Disorder, HIV, and HCV  
Syndemic in Primary Care



# Syndemic

*Noun* /sin"dem'ik/ (*plural* syndemics)

- “Two or more epidemics (i.e., notable increases in the rate of specific diseases in a population), interacting synergistically and contributing, as a result of their interaction, to excess burden of disease in a population” (Singer & Clair, 2003, p. 425)



# The Opioid, HIV, Hepatitis C Syndemic

- 47,600 Americans died of opioid overdoses in 2017 (CDC, 2018)
- Prevalence of infectious disease among people who inject opioids
  - *Hepatitis C virus (HCV): 67% (Nelson et al., 2011)*
  - *HIV: 33% (Mathers et al., 2007)*
- 10% of people living with HIV are infected through injection drug use (IDU)
- 2015 Scott County Indiana HIV outbreak – 181 new HIV diagnoses (Peters et al., 2016)
  - *88% had injected extended-release oxycodone*
  - *90% were coinfecting with HCV*

# Addressing the Syndemic

- The opioid/HIV/HCV syndemic has been described as one of the most pressing public health issues facing the United States today (Perlman and Jordan, 2018)
- Addressing it requires a collaborative and coordinated approach that
  - *Prevents and treats the individual components*
  - *Tackles the factors that create disease overlaps*
- Primary care providers must understand how stigma associated with the syndemic perpetuates illness and social inequality

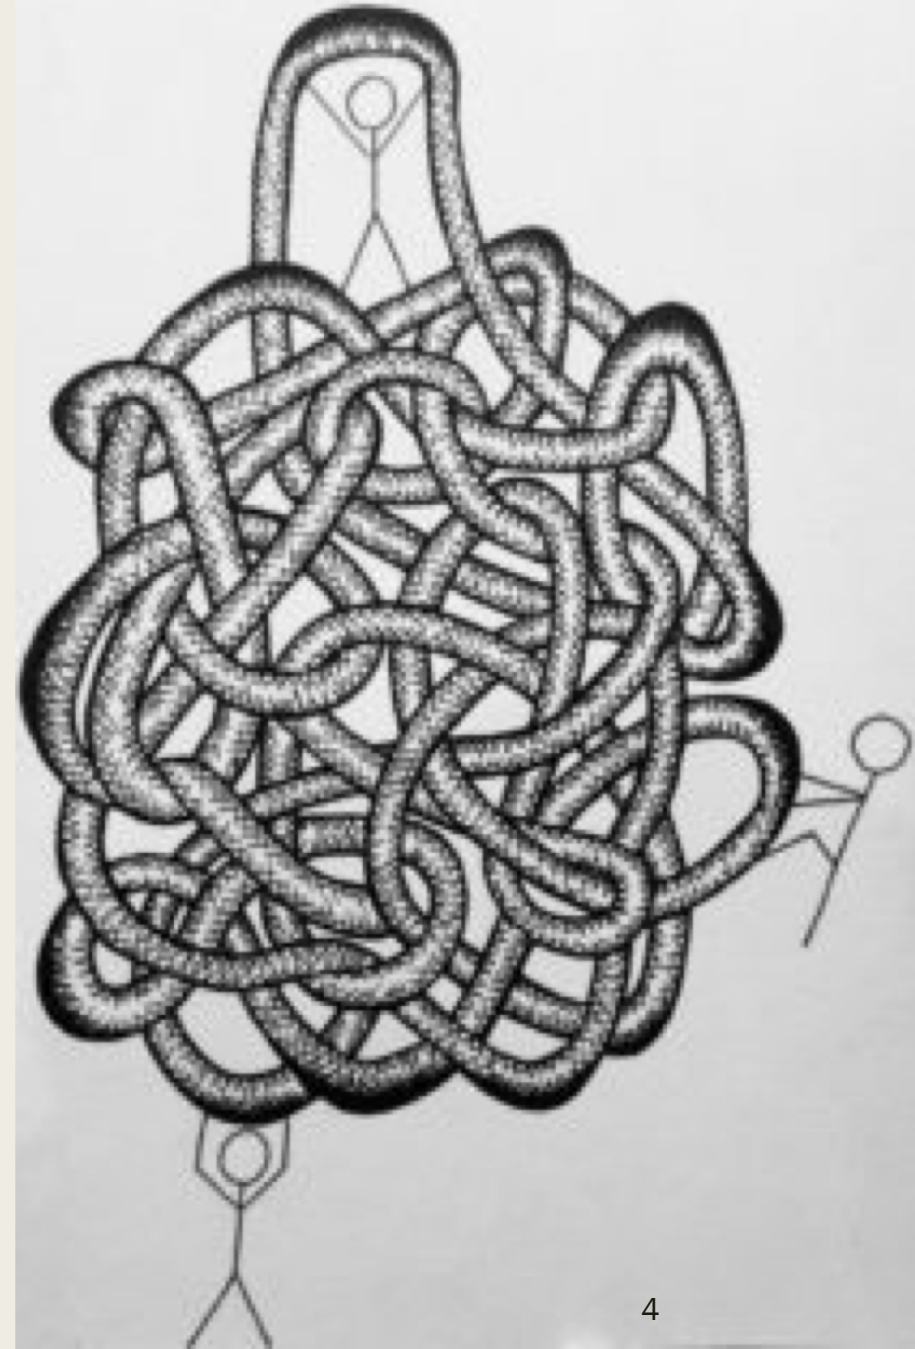

# Stigma Framework (Link & Phelan, 2001)

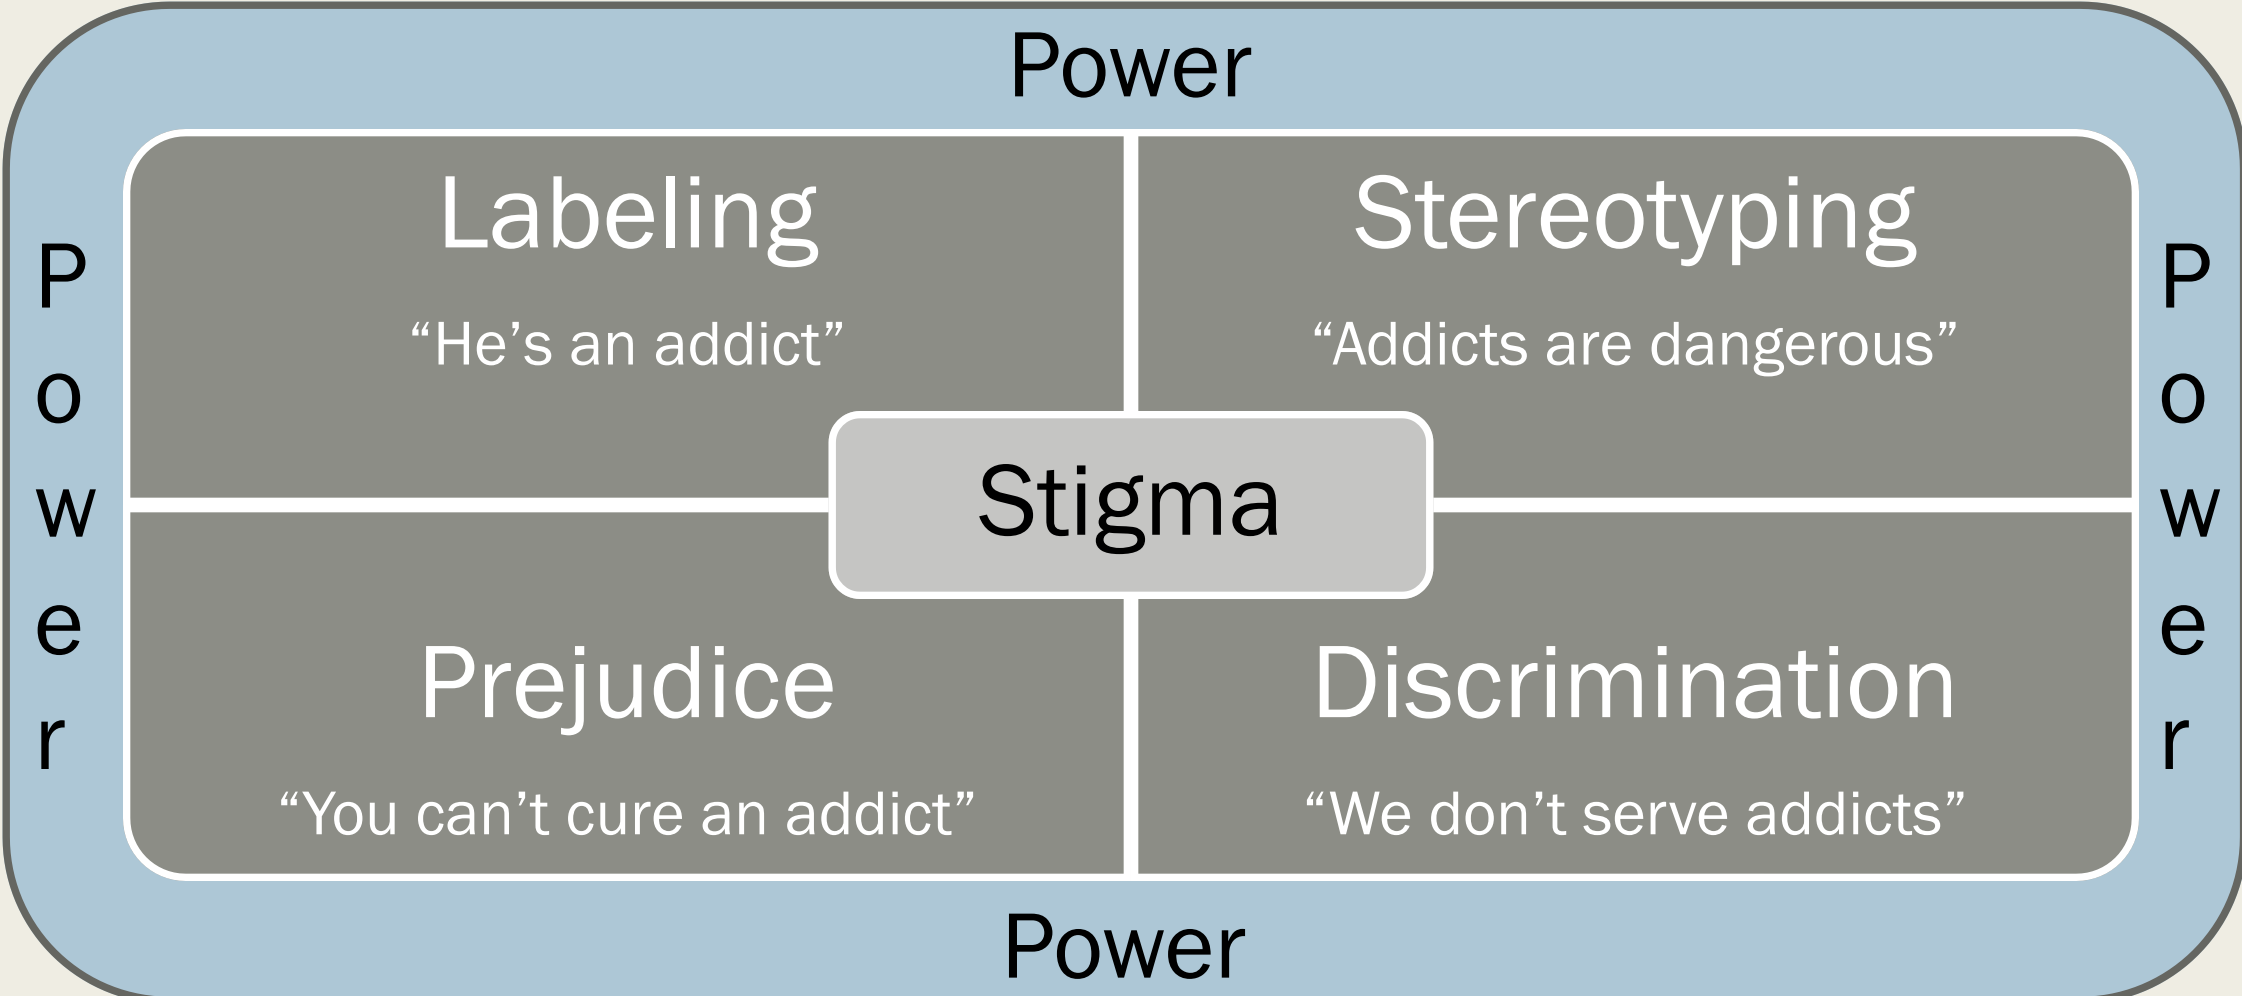

# Stigma in the Syndemic

Seven Types of Stigma

| Type 1                                                                                           | Type 2                                                                                                         | Type 3                                                                                                          | Type 4                                                                                                                                        | Type 5                                                                                                                                       | Type 6                                                                                                                                   | Type 7                                                                                                                            |
|--------------------------------------------------------------------------------------------------|----------------------------------------------------------------------------------------------------------------|-----------------------------------------------------------------------------------------------------------------|-----------------------------------------------------------------------------------------------------------------------------------------------|----------------------------------------------------------------------------------------------------------------------------------------------|------------------------------------------------------------------------------------------------------------------------------------------|-----------------------------------------------------------------------------------------------------------------------------------|
| <b>Self Stigma</b>                                                                               | <b>Perceived Stigma</b>                                                                                        | <b>Label Avoidance</b>                                                                                          | <b>Health Practitioner Stigma</b>                                                                                                             | <b>Public Stigma</b>                                                                                                                         | <b>Stigma by Association</b>                                                                                                             | <b>Structural Stigma</b>                                                                                                          |
| Self-stigma happens when the person with substance use disorder internalizes negative attitudes. | Perceived stigma is the belief that others have negative beliefs about people with substance use disorder.     | This is when a person chooses not to seek substance abuse services to avoid being assigned a stigmatized label. | This takes place any time a health professional allows stereotypes and prejudices about substance abuse to negatively affect a client's care. | Occurs when the public endorses negative stereotypes and prejudices, resulting in discrimination against people with substance use disorder. | This occurs when the effects of stigma are extended to someone linked to a person with substance use disorder.                           | Institutional policies or other societal structure that result in decreased opportunities for people with substance use disorder. |
| <b>Example:</b> "I don't deserve to see my kids until I get clean."                              | <b>Example:</b> "There's no use attending that event. No one wants to be around someone with substance abuse." | <b>Example:</b> "I don't want to go to rehab. They'll just say I'm a 'junkie'."                                 | <b>Example:</b> "I'm not going to refill your medication because you'll just sell it to get high."                                            | <b>Example:</b> "We don't allow people who abuse substances to participate in our program because they are dangerous."                       | <b>Example:</b> "I don't spend time with Linda anymore. Her son abuses heroin and I don't want people to think I condone that behavior." | <b>Example:</b> "Law prohibits your receipt of housing assistance if you are currently abusing prescription opioid medications."  |

(Adapted from Grappone, 2017)

# Structural Vulnerability

- Confluence of structural barriers and social conditions that undermine health status and outcomes
- Vulnerability index – 15 indicators (Van Handel, et al., 2015)
  - *Reflects Census tracts with higher probabilities of infectious disease outbreaks among people who inject drugs*
  - *6 key constructs*
    - Overdose death rates
    - Rx opioid sales
    - Buprenorphine capacity via waiver
    - % non-Hispanic white ethnicity
    - Per capita income
    - Unemployment rate
  - *220 counties in the 95<sup>th</sup> percentile of vulnerability*

# Structural Vulnerability

- Confluence and outbreaks
- Vulnerability
  - Reflects amount of
  - 6 key
  - Over
  - Rx
  - Bu
  - %
  - Pe
  - Ur
  - 220

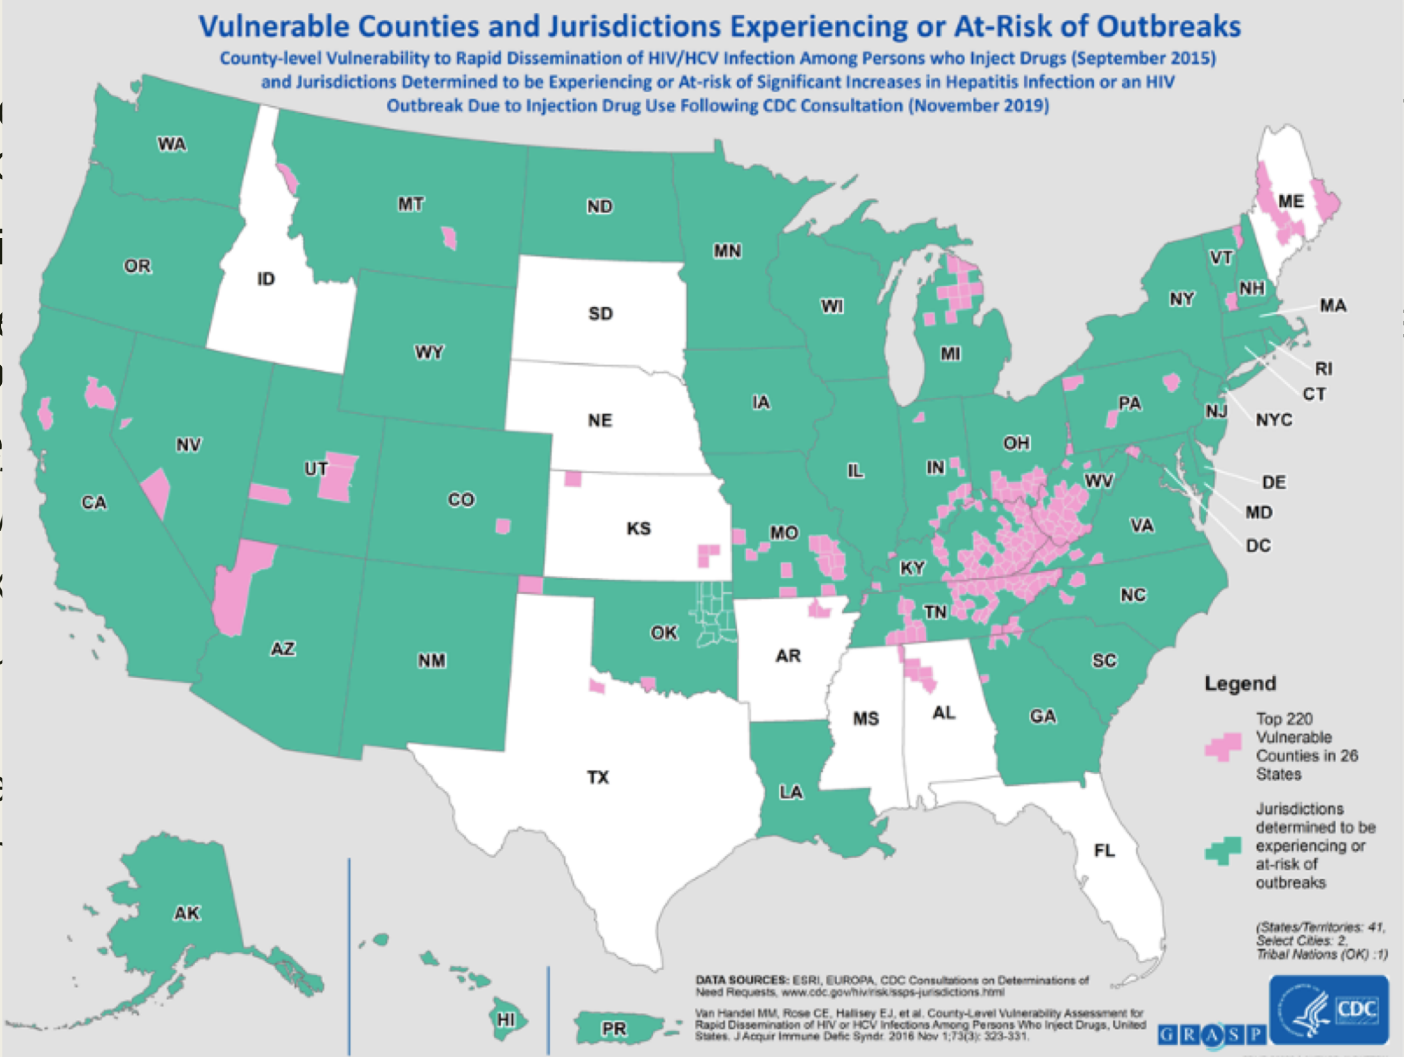

health status  
 use outbreaks



# Structural Competency

- Practice of social reflection that promotes understanding of how upstream decisions perpetuate and promote downstream inequities
  - *Housing policies*
  - *Transportation infrastructure*
  - *Supply chains for food and health care delivery systems*
  - *Criminalization (e.g., vagrancy, HIV, poverty)*
  - *Medicalization of health care*
  - *Definitions of illness and health*
- Bridges social determinants of health and clinical interventions
- Supports an “enabling environment” for self-care interventions (World Health Organization, 2019)

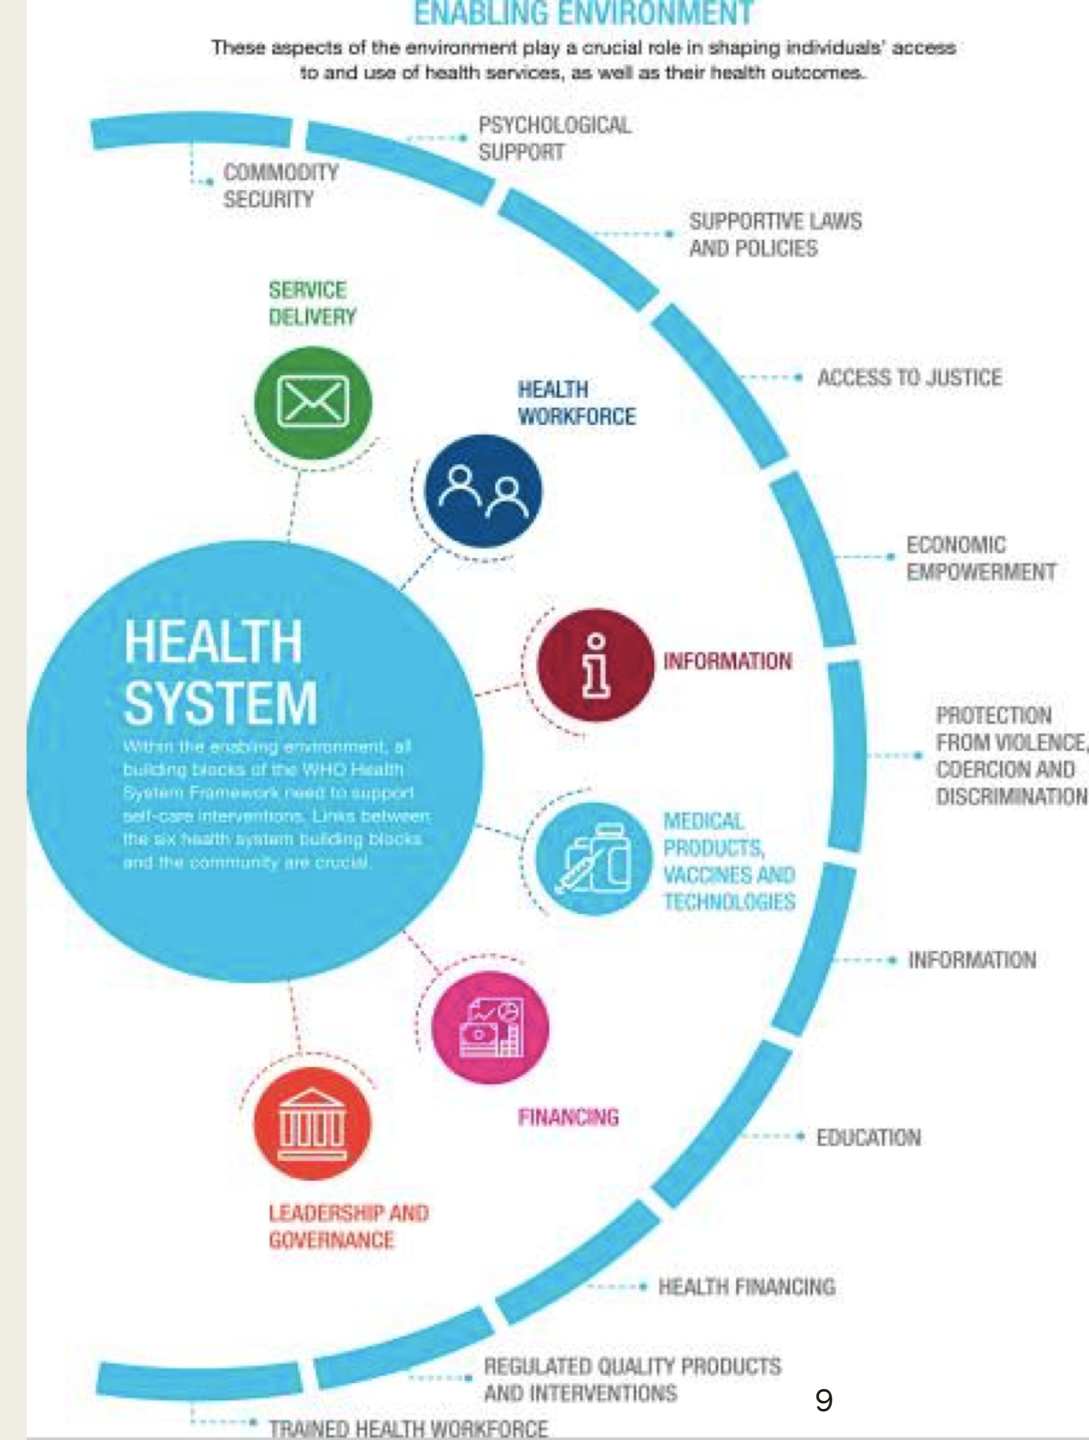

# Cultural vs. Structural Competence

- Cultural Competency:
  - *Respect for cultural health beliefs*
  - *Elimination of language barriers*
  - *Addressing health literacy*
  - *Awareness of implicit bias*
- ➔ *Focus is on identifying clinician bias and improving communication*

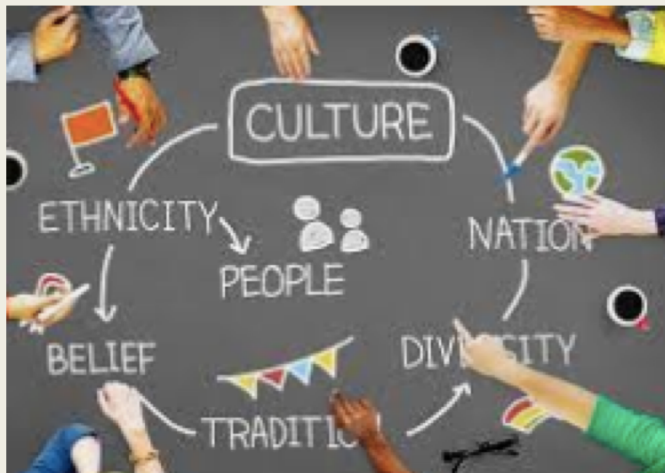

- Structural Competency:
  - *Recognition of how context affects symptom presentation*
  - *Clinicians expected to advocate for corrective actions*
- ➔ *Goal is to enhance recognition of social, economic, and political structures that lead to health inequities*

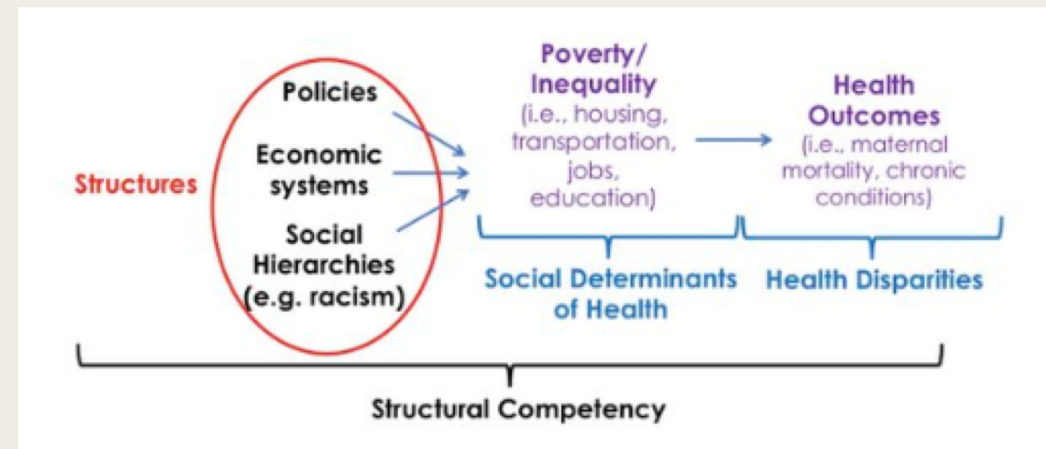



# Equality, Equity, and Justice

## Equality

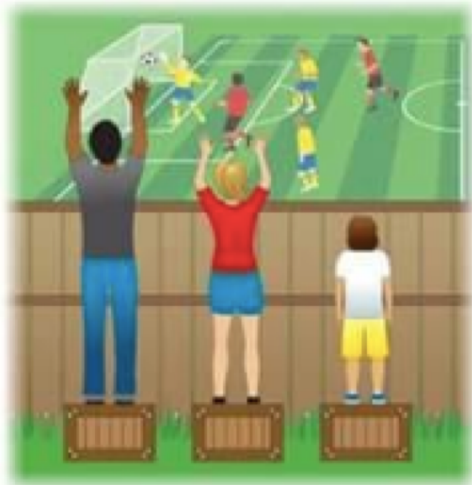

The assumption is that everyone benefits from the same supports. This is equal treatment.

## Equity

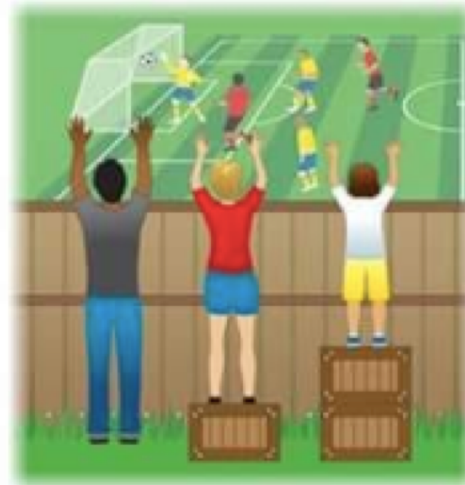

Everyone gets the supports they need (this is the concept of "affirmative action"), thus producing equity.

## Justice

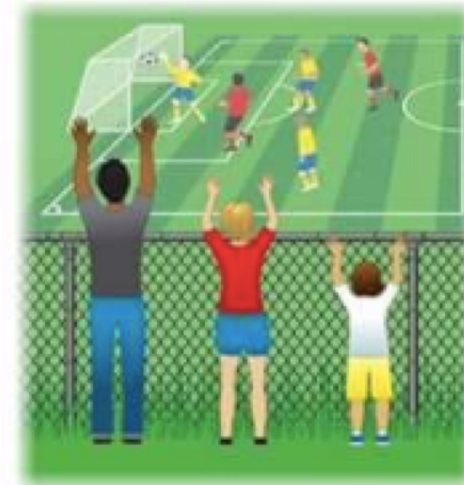

All 3 can see the game without supports or accommodations because the cause(s) of the inequity was addressed. The systemic barrier has been removed.

# 8 Structural Factors (Metzl & Hansen, 2014)

Access to Health Care

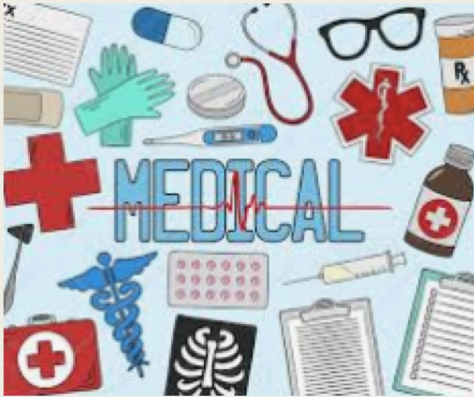

Health Insurance

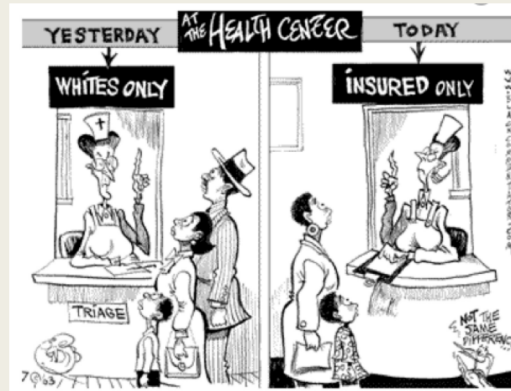

Medicalization

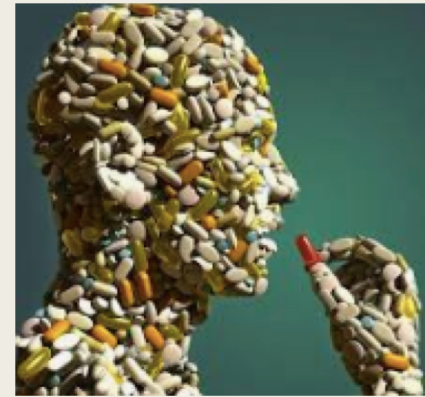

Neighborhood

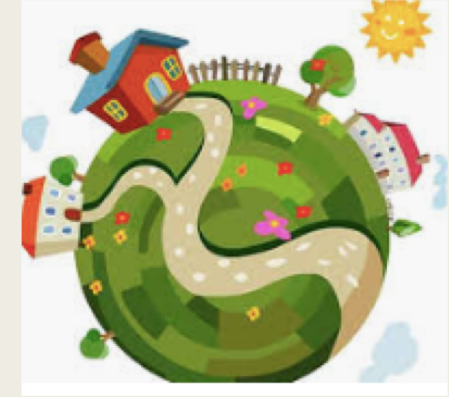

Health Care Delivery

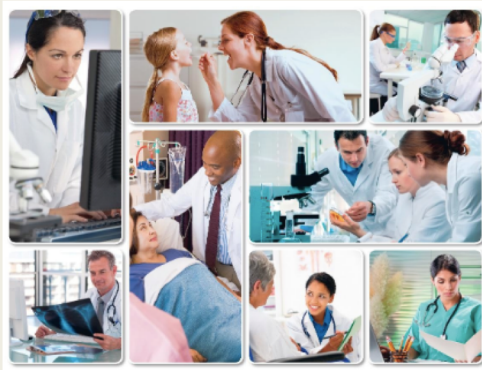

Institutional Racism

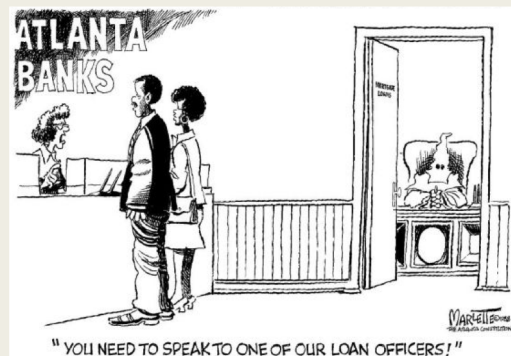

Household Income

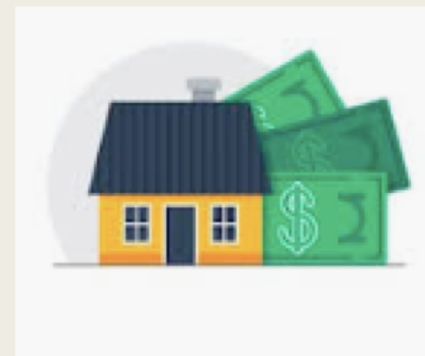

Social Policies

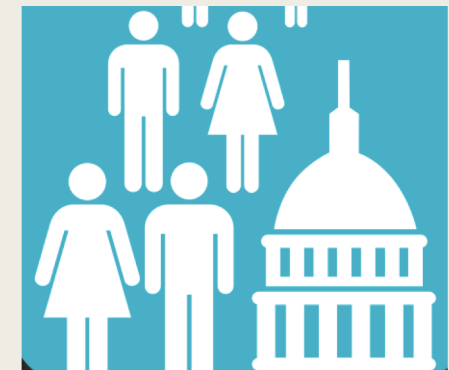

# Metzel & Hansen's (2014) Structural Competency Framework

Comprised of "five intersecting skill-sets" (p. 6)

- 1) Recognizing the structures that shape clinical interactions
- 2) Developing extra-clinical language of structure
- 3) Rearticulating "cultural" presentations in structural terms
- 4) Observing and imagining structural interventions
- 5) Developing cultural humility

# Clinical Scenario

*“Mrs. Jones is an African American woman in her mid-60s who comes late to her office visit and refuses to take her blood pressure medications as prescribed.”*

*- Metzel & Hansen (2014, p. 2)*

# 1. Recognizing Structures that Shape Clinical Interactions

- Need to recognize how structural factors affect medical decision-making

*“Mrs. Jones is an African American woman in her mid-60s who comes late to her office visit and refuses to take her blood pressure medications as prescribed.”*

## **Traditional Approach:**

- Socioeconomic background
- Cultural beliefs
- Health literacy
- Lifestyle factors
- Physician bias
- Trust of health care system
- Others?

## **Structurally Competent Approach:**

- Time allotted to exam by insurance companies
- Limited funding for research on alternative therapies
- Biomedical perspective of the healthcare system
- Policies regarding the prices of prescription drugs
- Culture of diagnosis and pharmaceutical treatment
- Others?

## 2. Developing an Extra-clinical Language of Structure

- Understanding structure from a multidisciplinary (e.g., urban planning, sociology, economics, history, etc.) perspective

*“Mrs. Jones is an African American woman in her mid-60s who comes late to her office visit and refuses to take her blood pressure medications as prescribed.”*

### **Traditional Approach:**

- Social determinants of health
- Health disparities
- Policy changes
- Investments in impoverished areas
- Others?

### **Structurally Competent Approach:**

- Social hierarchies
- Nature of racism
- Structural violence
- Political systems that promote stigma
- Systems of privilege
- Others?



# 3. Rearticulating “Cultural” Presentations in Structural Terms

- Identifying how structures create barriers to care and inequities

*“Mrs. Jones is an African American woman in her mid-60s who comes late to her office visit and refuses to take her blood pressure medications as prescribed.”*

## **Traditional Approach:**

- Familiarity with cultural values
- Ethnic identity
- Cultural value of timeliness
- Others?

## **Structurally Competent Approach:**

- Local transportation infrastructure
- “Strategies” for getting to the clinic
- Biases in diagnosis that require frequent visits
- Institutional racism
- White privilege
- Others?

# 4. Observing and Imagining Structural Interventions

- Understanding that structures are human creations and are not immutable

*“Mrs. Jones is an African American woman in her mid-60s who comes late to her office visit and refuses to take her blood pressure medications as prescribed.”*

## **Traditional Approach:**

- Pill organizers
- Phone-based reminders
- Educational brochures
- Transportation vouchers
- Reminder phone calls
- Others?

## **Structurally Competent Approach:**

- “Prescribing” food – bills sent to health center
- Eliminating medical debt
- Creating community spaces in urban areas
- Refrigerated trucks to deliver food to rural areas
- Patient-defined goals
- Community-based participatory research
- Others?



# 5. Developing Structural Humility

- Remaining open to the evolving nature of a patient's narrative

*“Mrs. Jones is an African American woman in her mid-60s who comes late to her office visit and refuses to take her blood pressure medications as prescribed.”*

## **Traditional Approach:**

- Patient chart as a definitive history
- Medical authority
- Static referrals to specialty care
- Focus on biomedical goals
- Others?

## **Structurally Competent Approach:**

- Ongoing dialogue to identify new challenges
- Developing new networks to meet patient needs
- Patient as co-equal collaborator/authority
- Recognizing limitations of medical expertise
- Others?

# Example Training Programs

- Albert Einstein College of Medicine
  - *Research-base health activism program*
  - *Physicians as advocates for "public health, social justice, and health equality"*
- University of Michigan - Critical Consciousness (Kumagai & Lypson, 2009)
  - *Understanding medicine in the context of society, culture, and history*
  - *Identifies, and seeks to address, social problems*
- Accreditation Council for Graduate Medical Education
  - *Health disparities competencies*
  - *Quality Improvement: Health Care Disparities Collaborative*

# Goals for Structural Competency

- Ongoing engagement and learning about structural determinants
- Multidisciplinary engagement beyond health-related disciplines
- Recognition of the possibility for personal growth and practice
- Developing habits and practices that promote active engagement among other providers
- Active involvement in social, political, and economic activities to promote health

# Applying Metzel & Hansen's Framework to the Opioid/HIV/HCV Syndemic

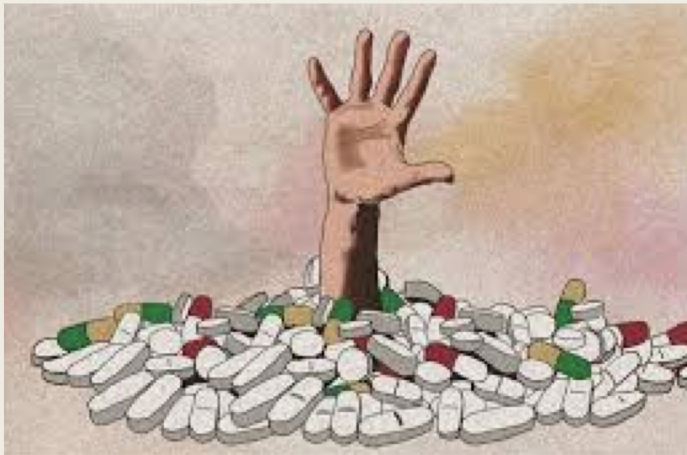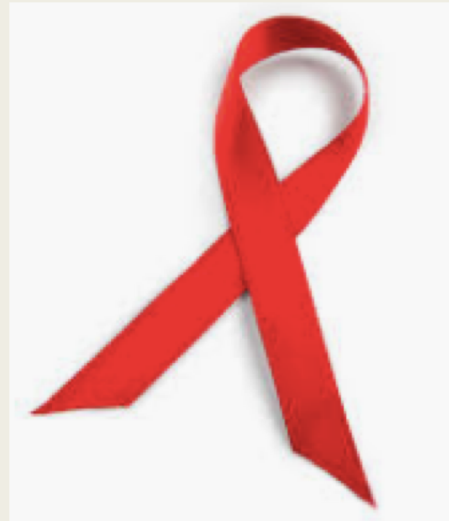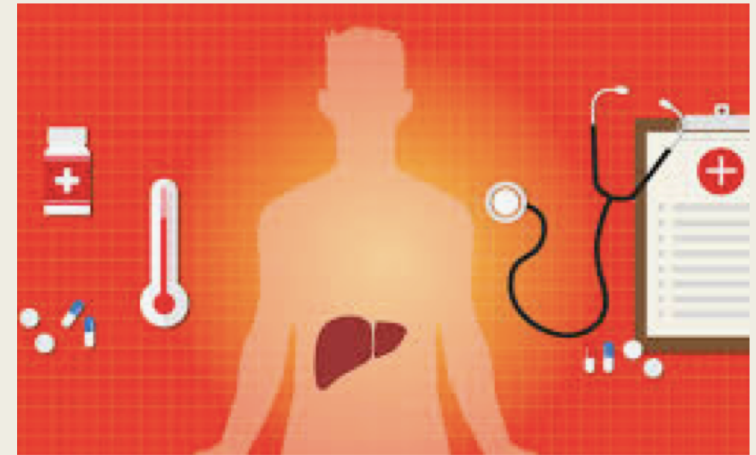

# 1. Recognizing Structures that Shape Clinical Interactions

## ■ Opioids

- *Marketing of prescription opioid medications (e.g., pain as the 6<sup>th</sup> vital sign)*
- *Targeting areas with existing pain management clinics*
- *Pharmaceutical companies understating the addictiveness of opioids*

## ■ HIV

- *Development of separate systems of care for people affected by HIV*
- *Federal government's lack of investment in drug development*

## ■ HCV

- *High cost of effective treatments*
- *Insurers restricting access (e.g., excluding people who use drugs)*

## 2. Developing an Extra-clinical Language of Structure

- Social Networks: "[Loneliness is at Epidemic Levels in America](#)" (Cigna, 2020)
  - *The role of social media (73% of heavy users vs. 52% among light users)*
  - Screening tools for [Depression](#), [Alcohol and Drug Use](#), and [Loneliness](#)
  - [Reimbursement](#) for preventive care services
- Infrastructure: Inadequate [transportation](#) as a barrier to healthcare engagement
- Financial services: housing instability
  - [Prejudged: The Stigma of Eviction Records](#)
  - [Kept Out](#): lenders perpetuate ethnic wealth gaps
- Legal system: the [criminalization](#) of drug use

# Structural Stigma and Discrimination: Examples

- Quiz: [Could You Manage as a Poor American?](#) (New York Times, January 28, 2020)
- Institutional and Structural Barriers to HIV Testing (Meyerson et al., 2014)
  - *Institutional discrimination (intentional acts)*
    - Staff reacting negatively to request for an HIV test
    - Staff expressing judgments about patients' presumed HIV risk behaviors
  - *Structural discrimination (unintentional)*
    - Separate systems of care for people living with/at risk for HIV
    - Limiting HIV testing to Wednesdays only
    - Test site difficult to find (in basement)
    - "Public" waiting room mixed with WIC recipients (forces disclosure)
- Policies restricting voting rights

# Structural Stigma and Discrimination:

Exam

- Quiz:
- Instit
- Polici

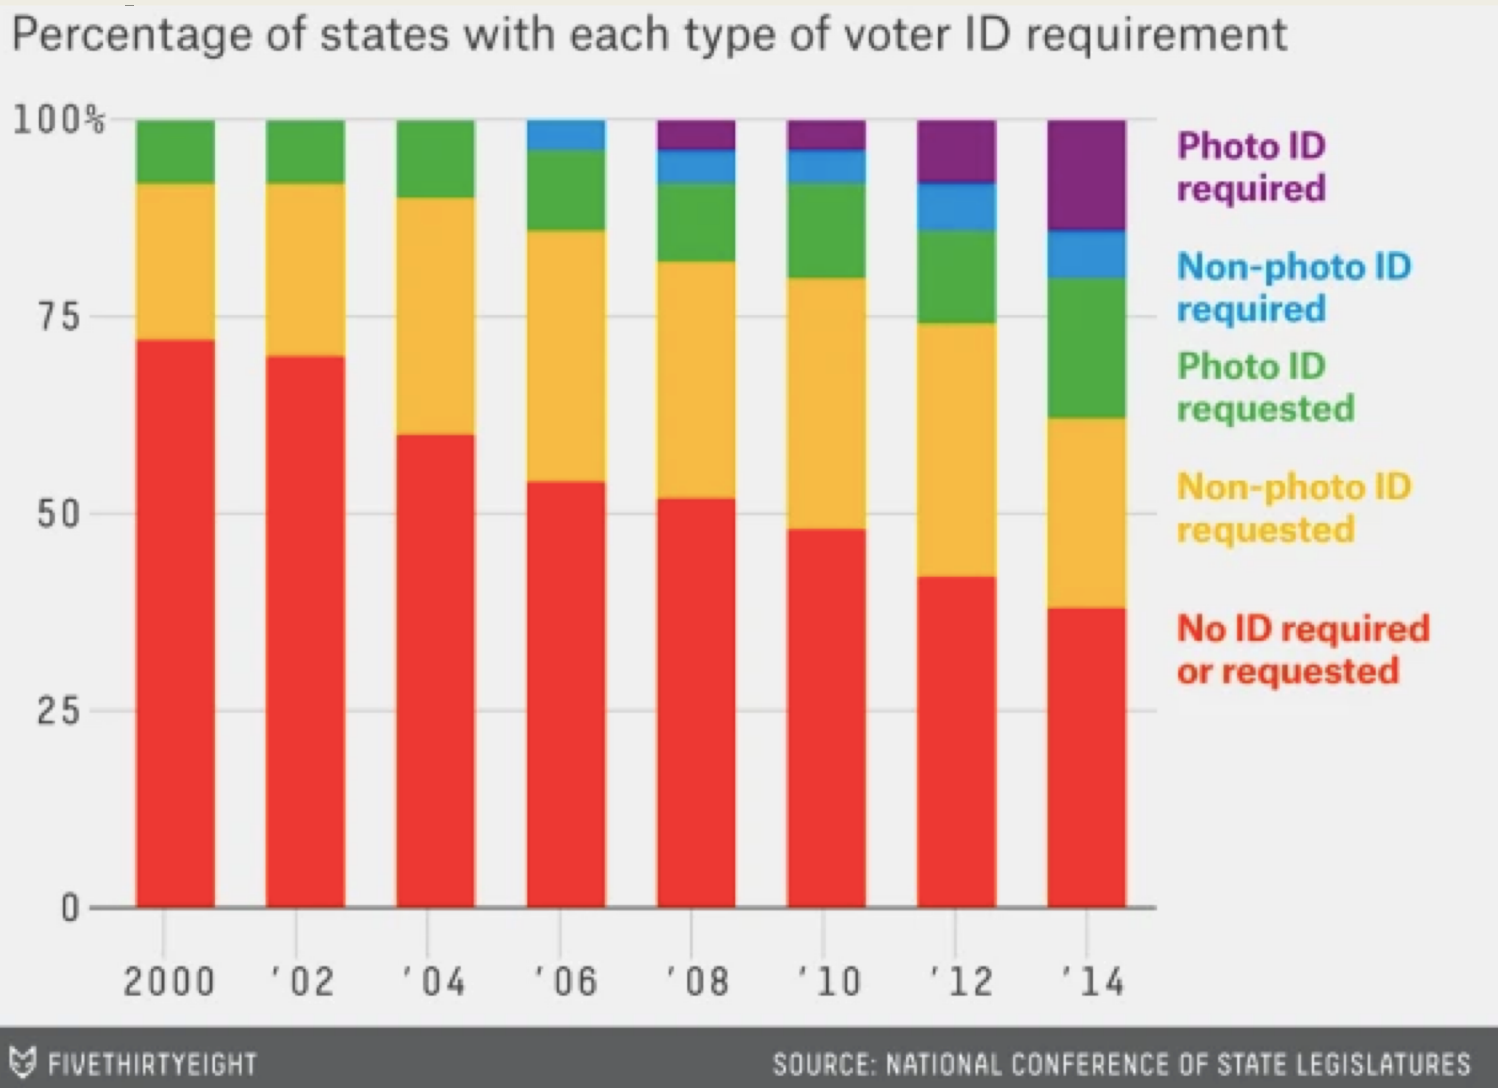

(28, 2020)  
)  
rs



# Structural Stigma and Discrimination: Examples

- Quiz: [Could You Manage as a Poor American?](#) (New York Times, January 28, 2020)
- Institutional and Structural Stigma (Meyer et al., 2014)
  - *Institutional discrimination*
    - Staff reactions
    - Staff expressions of bias
  - *Structural discrimination*
    - Separate systems
    - Limiting HIV risk behaviors
    - Test site difficult to find (in basement)
    - “Public” waiting room mixed with WIC recipients (forces disclosure)
- Policies restricting voting rights

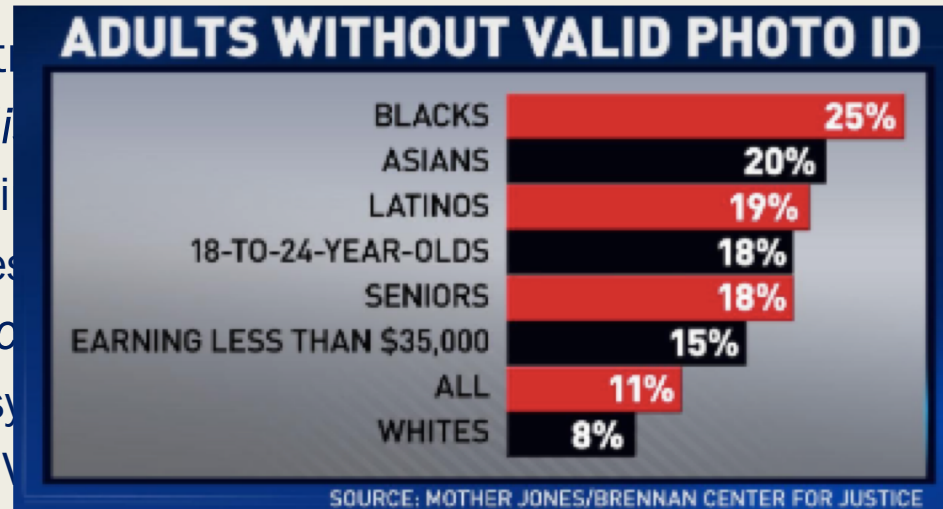

# Structural Stigma and Discrimination: Examples

How Gerrymandering Works

- Quiz:
- Institutional
- /
- S
- Policy

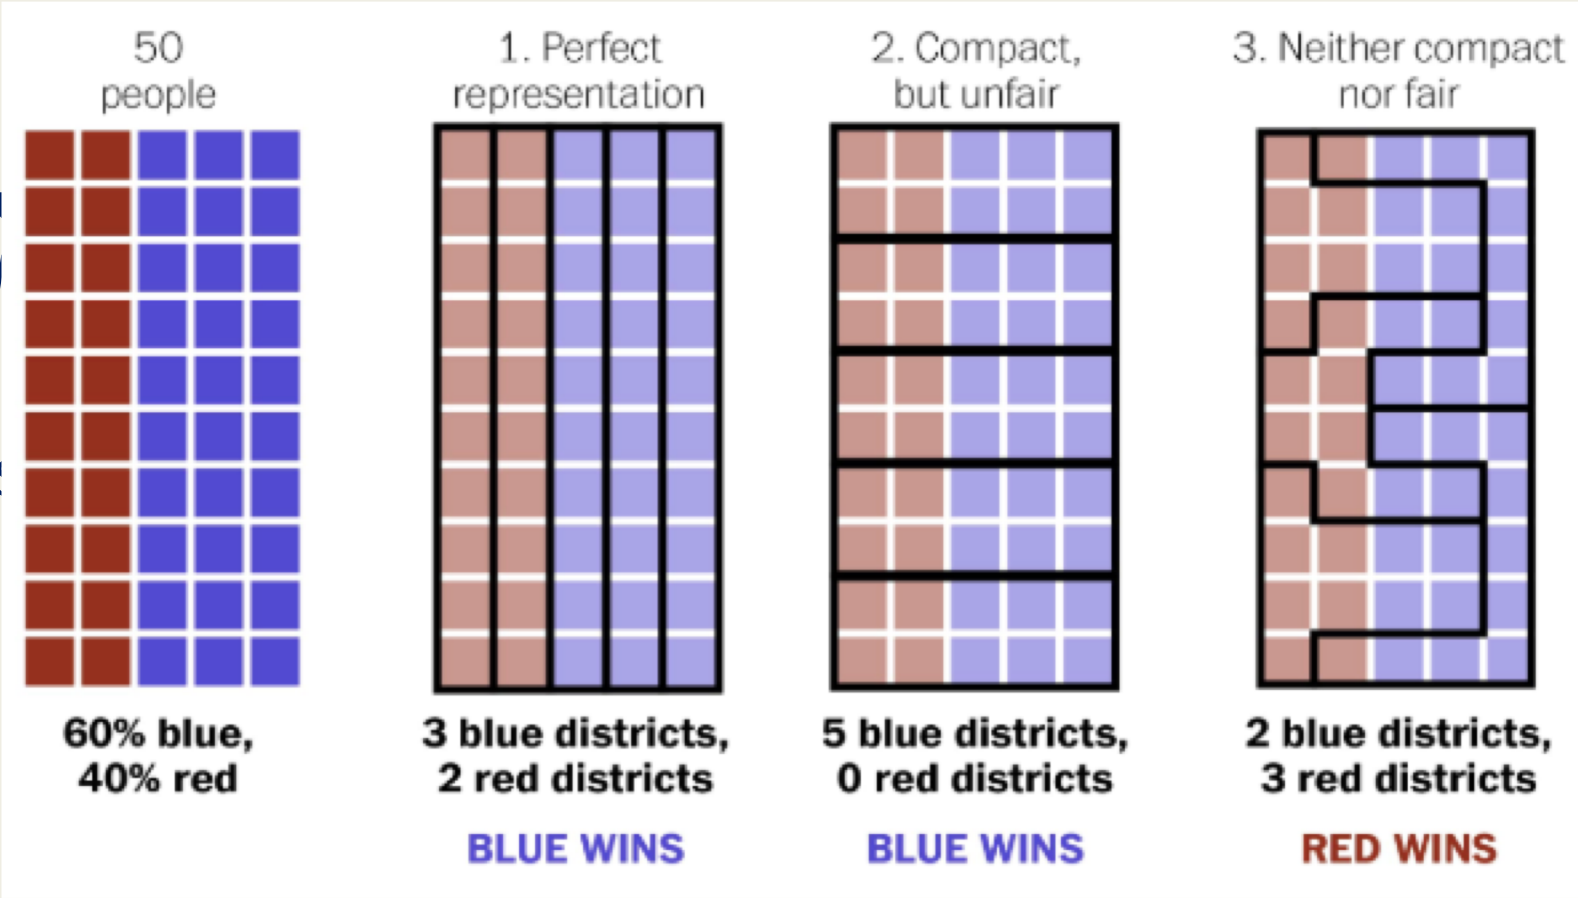

2020)

# Structural Stigma and Discrimination: Examples

## Gerrymandering in North Carolina

- Quiz: [Could you identify the state?](#)
- Institutional:
  - Institutional
  - S
  - S
  - Structural
  - S
  - L
  - T
  - “
- Policies re

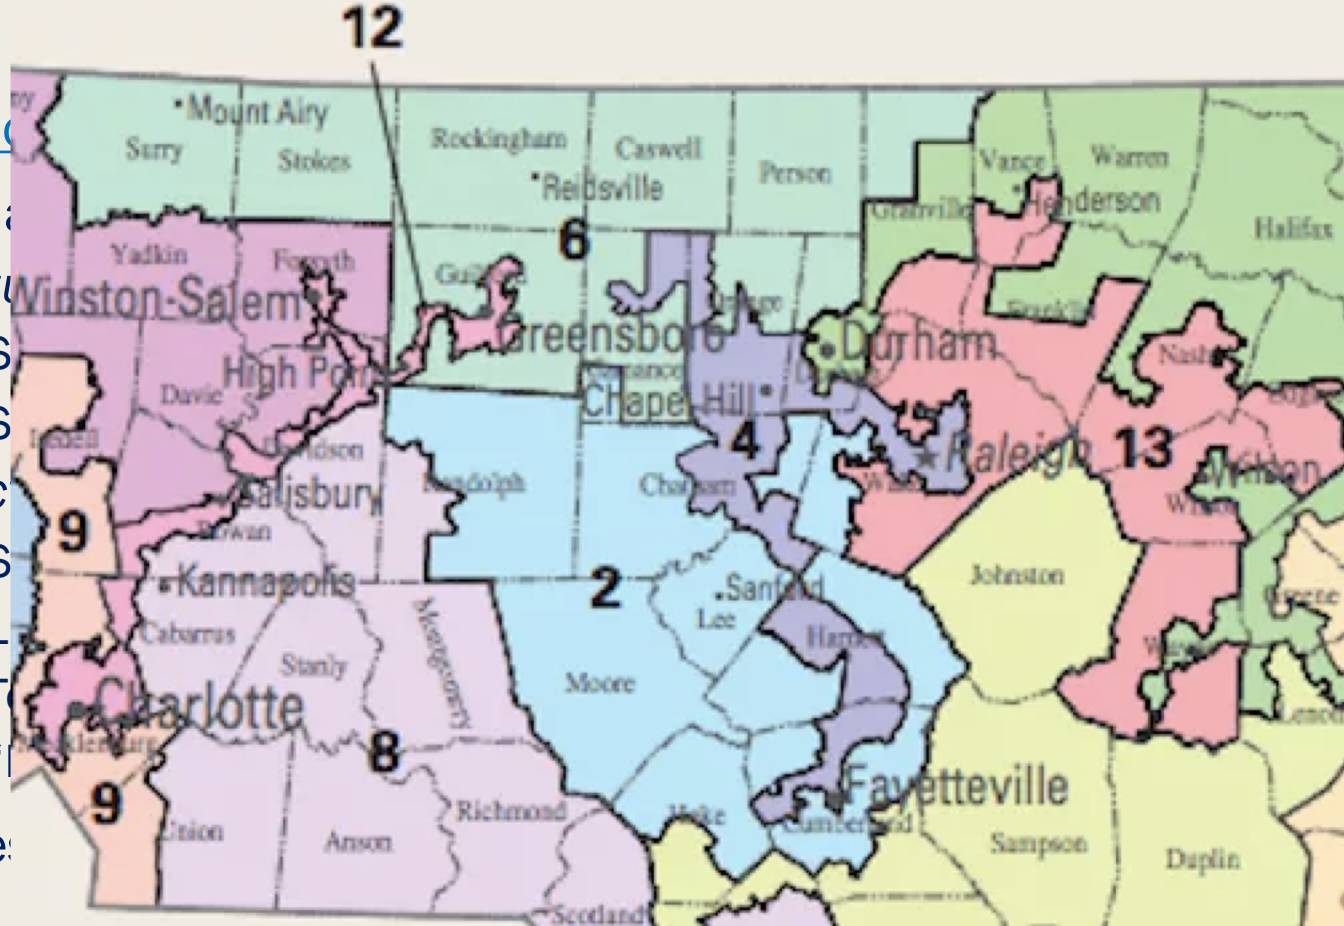

(by 28, 2020)

(14)

vivors

# 3. Rearticulating “Cultural” Presentations in Structural Terms

- Higher prevalence of cardiovascular disease:
  - *Cultural: due to culture-based dietary choices*
  - *Structural: living in low-resource areas (e.g., food deserts, [life expectancy by zip code](#))*
- Mental illness:
  - *Cultural: genetic predisposition*
  - *Structural: poverty affects brain development*
- Late diagnosis of HIV infection (i.e., AIDS diagnosis):
  - *Cultural: lack of trust in the health care system*
  - *Structural: Medicaid programs do not cover HIV prevention/care until an AIDS diagnosis*

# 4. Observing and Imagining Structural Interventions

- Providing OUD, HCV, and HIV screening according to evidence-based guidelines
- Increasing access to medication-assisted treatment (MAT) for OUD
  - *Expanding number of primary care providers with Drug Addiction Treatment Act of 2000 (DATA 2000) waivers to prescribe buprenorphine*
  - *Increased funding for MAT treatment in primary care settings*
- Expanding needle exchange programs and safe injection sites
- Removing insurance barriers to evidence-based treatments
- Enhancing referral networks to specialty services within primary care settings
- Active promotion of social justice in health care

# 5. Developing Structural Humility

- Taking a patient-centered approach
  - *Being open to patients' perspectives, even if they judge us in a negative light*
- Understanding the structure of privilege
  - *Ethnicity: [What is White Privilege?](#) (Tim Wise)*
  - *Physical abilities: [Able-Bodied Privilege Checklist](#)*
  - *Gender: [160+ Examples of Male Privilege](#)*
  - *General: [How Privileged Are You?](#)*
- Screening for structural vulnerability
- Asking yourself, “What role might social, political, economic, or cultural factors play” in the health problems this patient is facing? (Metzl et al., 2018, p. 193)

# Antecedents of Patient-Centered Care

| Antecedents                                                 | Examples                                                                                                                                                                                                                                                                                                                                                                                                                                                                                                  |
|-------------------------------------------------------------|-----------------------------------------------------------------------------------------------------------------------------------------------------------------------------------------------------------------------------------------------------------------------------------------------------------------------------------------------------------------------------------------------------------------------------------------------------------------------------------------------------------|
| 1. Organizational Values, Policies, and Procedures          | <ul style="list-style-type: none"> <li>1.1 Health care provider skills and training (e.g., case management, motivational interviewing)</li> <li>1.2 Creating environments that are safe, stable, and social</li> <li>1.3 Deploying interprofessional care teams</li> <li>1.4 Simplifying the logistics and continuity of access to providers</li> <li>1.5 System rooted in harm reduction and the social determinants of health</li> <li>1.6 Comprehensive assessment and screening procedures</li> </ul> |
| 2. Clinical Approaches that Strengthen Therapeutic Alliance | <ul style="list-style-type: none"> <li>2.1 Open communication and active listening</li> <li>2.2 Investing time to build trust</li> <li>2.3 Affirming the client's ability to succeed in their goals</li> <li>2.4 Adopting an individualized approach</li> <li>2.5 Collaborating with clients</li> <li>2.6 Taking a holistic view</li> </ul>                                                                                                                                                               |
| 3. Clinical Approaches that Support Shared Decision-Making  | <ul style="list-style-type: none"> <li>3.1 Sharing information in a manner appropriate for the client</li> <li>3.2 Empowering clients as experts in treatment need and building capacity for self-responsibility</li> <li>3.3 Establishing respectful relationships with clients</li> <li>3.4 Being flexible in approaches offered</li> </ul>                                                                                                                                                             |
| 4. Clinical Approaches that Support Individualized Care     | <ul style="list-style-type: none"> <li>4.1 Encouraging clients' input and preferences</li> <li>4.2 Establishing caring relationships with clients</li> <li>4.3 Offering a flexible continuum of care</li> </ul>                                                                                                                                                                                                                                                                                           |

(Marchand, et al., 2019)

# Structural Vulnerability Assessment Tool

(Bourgois et al., 2017)

| Domain                                                                                                          | Screening Questions                                                                          |
|-----------------------------------------------------------------------------------------------------------------|----------------------------------------------------------------------------------------------|
| Financial security                                                                                              | Do you have enough money to live comfortably – pay rent, get food, pay utilities, telephone? |
| Residence                                                                                                       | Do you have a safe, stable place to sleep and store your possessions?                        |
| Risk environments                                                                                               | Do the places where you spend your time each day feel safe and healthy?                      |
| Food access                                                                                                     | Do you have adequate nutrition and access to healthy food?                                   |
| Social network                                                                                                  | Do you have friends, family, or other people who help you when you need it?                  |
| Legal status                                                                                                    | Do you have any legal problems?                                                              |
| Education                                                                                                       | Can you read?                                                                                |
| Discrimination                                                                                                  | Have you experienced discrimination?                                                         |
| Ask yourself (silently): May some service providers (including me) find it difficult to work with this patient? |                                                                                              |



# Integrated Approach to Primary Care: Eliminating Stigma in the Syndemic

- All patients
  - *Perform screening (OUD, HIV, HCV) according to evidence-based guidelines*
  - *Assess structural vulnerability*
- New opioid prescriptions – [CDC Guidelines for Management of Chronic Pain](#)
  - *Consider medication-alternatives to pain management*
  - *Prescribe naloxone along with opioid medications*
  - *Assess barriers patients face to safe use, storage, and disposal of prescription medications*
- Patients with opioid use disorder
  - *Obtain a DATA 2000 waiver to provide MAT*
  - *Perform regular assessments (HIV, HCV, structural barriers)*

Questions?

# References

- Bourgois, P., Holms, S. M., Sue, K., & Quesada, J. (2017). Structural vulnerability: Operationalizing the concept to address health disparities in clinical care. *Academic Medicine*, 92(3), 299-307. doi: 10.1097/ACM.0000000000001294
- CDC/NCHS, National Vital Statistics System, Mortality. CDC WONDER, Atlanta, GA: US Department of Health and Human Services, CDC; 2018. <https://wonder.cdc.gov>.
- Grappone, G. (2017). Overcoming stigma. NAMI Advocate. [https://www.namikenosha.org/uploads/4/9/0/6/49066629/overcoming\\_stigma.pdf](https://www.namikenosha.org/uploads/4/9/0/6/49066629/overcoming_stigma.pdf).
- Link, B. & Phelan, J. (2001). Conceptualizing stigma. *Annual Review of Sociology*, 27, 363-385.
- Hansen, H. & Metzel, J. M. (2019). *Structural competency in mental health and medicine: A case-based approach to treating the social determinants of health*. Springer.
- Marchand K, Beaumont S, Westfall J, et al. Conceptualizing patient–entered care for substance use disorder treatment: findings from a systematic scoping review. *Subst Abuse Treat Prev Policy*. 2019;14(1):37 doi: 10.1186/s13011-019-0227-0
- Mathers, B., Degenhardt, L., Phillips, B., Wiessing, P. B., Hickman, M., Strathdee, S. A., ..., 2007 Reference Group to the UN on HIV and Injecting Drug Use. (2008). Global epidemiology of injecting drug use and HIV among people who inject drugs: A systematic review. *The Lancet*, 372(9651), 1733-1745. doi: 10.1016/S0140-6736(08)61311-2
- Metzel, J. M. & Hansen, H. (2014). Structural competency: Theorizing a new medical engagement with stigma and inequality. *Social Science & Medicine*, 103, 126-133. Doi: 10.1016/j.socscimed.2013.06.032
- Metzl, J. M., Petty, J., Olowojoba, O. V. (2018). Using a structural competency framework to teach structural racism in pre-health education. *Social Science & Medicine*, 199, 189-201.
- Meyerson, B., Barnes, P., Emetu, R., Bailey, M., Ohmit, A., & Gillespie, A. (2014). Institutional and structural barriers to HIV testing: Elements for a theoretical framework. *AIDS Patient Care & STDs*, 28(1), 22-27. Doi: 10.1089/apc.2013.0238
- Misir, P. (2015). Structuration theory: A conceptual framework for HIV/AIDS stigma. *Journal of the International Association of Physicians in AIDS Care*, 14(4), 328-334. Doi: 10.1177/2325957412463072
- Nelson, P. K., Mathers, B. M., Cowie, B., Hagan, H., Des Jarlais, H., Horyniak, D., & Degenhardt, L. (2011). Global epidemiology of hepatitis B and hepatitis C in people who inject drugs: Results of systematic reviews. *The Lancet*, 378(9791), 571-583. doi: 10.1016/S0140-6736(11)61097-0
- Nicholson, A. (2018). *Integrating responses at the intersection of opioid use disorder and infectious disease epidemics: Proceedings of a workshop*. Washington, DC: The National Academies Press.
- Perlman, D. C. & Jordan, A. E. (2018). The syndemic of opioid misuse, overdoses, HCV, and HIV: Structural-level causes and interventions. *Current HIV/AIDS Reports*, 15(2), 96-112. Doi: 10.1007/s11904-018-0390-3
- Peters, P. J., Pontones, P., Hoover, K. W., Patel, M. R., Galang, R. R., Shields, J., ..., Indiana HIV Outbreak Investigation Team. (2016). HIV infection linked to injection use of oxycodone in Indiana, 2014-2015. *New England Journal of Medicine*, 375(3), 229-239. doi: 10.1056/NEJMoa1515195
- Singer M. & Clair S. (2003). Syndemics and public health: reconceptualizing disease in bio-social context. *Medical Anthropology Quarterly*, 17(4), 423–41. doi: 10.1525/maq.2003.17.4.423
- Tervalon, M. & Murray-Garcia, J. (1998). Cultural humility versus cultural competence: A critical distinction in defining physician training outcomes in multicultural education. *Journal of Health Care for the Poor and Underserved*, 9(2), 117-125. doi: 10.1353/hpu.2010.0233
- Van Handel, M. M., Rose, C. E., Hallisey, E. J., Kolling, J. L., Zibbell, J. E., Lewis, B., ..., Brooks, J. T. (2016). County-level vulnerability assessment for rapid dissemination of HIV or HC infections among persons who inject drugs, United States. *Journal of Acquired Immune Deficiency Syndrome*, 73(3), 323-331.
